# Supplementary material for: Implementing a decision support system on the World Wide Web
Source: Royal Society of Chemistry journal article supplement (doi:10.1039/d2na00747a), 1996-03-01
Supplement: d2na00747a1.pdf [file d2na00747a1.pdf]

## Supporting Information

### Versatile assembly of metal sulfide supraparticles in aqueous phase

Menglei Wang,<sup>a,b</sup> Fulin Jia,<sup>b,c</sup> Jianxiao Gong,<sup>\*b</sup> and Yunsheng Xia<sup>\*a</sup>

#### Section 1. Calculation of Photothermal Conversion Efficiency.

1□ The photothermal conversion efficiency ( $\eta$ ) of different size Cu<sub>2</sub>S SPs was calculated as the following equation:

$$\begin{aligned}\eta &= hS (T_{\max, \text{SPs}} - T_{\max, \text{solvent}}) / [I (1 - 10^{-A_{808}})] \\ &= mc (T_{\max, \text{SPs}} - T_{\max, \text{solvent}}) / [I (1 - 10^{-A_{808}}) \tau_s] \\ t &= -\tau_s \ln \theta \\ \theta &= (T - T_{\text{surr}}) / (T_{\max, \text{SPs}} - T_{\text{surr}})\end{aligned}$$

where  $h$  is the heat transfer coefficient,  $S$  is the irradiated area,  $m$  is the mass (1.0 g) and  $C$  is the heat capacity (4.2 J g<sup>-1</sup>) of the solvent,  $A_{808}$  is the absorption of Cu<sub>2</sub>S SPs solutions (110 μg mL<sup>-1</sup>),  $\tau_s$  is calculated and shown in Figure S10.  $T_{\max, \text{SPs}}$  and  $T_{\max, \text{solvent}}$  are the highest temperature of the system and the surrounding, respectively. The detailed calculations were shown as follows:

$$\begin{aligned}\eta_{20 \text{ nm}} &= 1 \times 4.2 \times (64.3 - 23.6) / [0.75 \times (1 - 10^{-0.488}) \times 380.69] \times 100\% = 88.7\% \\ \eta_{40 \text{ nm}} &= 1 \times 4.2 \times (67.1 - 22) / [0.75 \times (1 - 10^{-0.915}) \times 428.29] \times 100\% = 67.1\% \\ \eta_{60 \text{ nm}} &= 1 \times 4.2 \times (75.4 - 23.5) / [0.75 \times (1 - 10^{-1.185}) \times 430.57] \times 100\% = 72.2\%\end{aligned}$$

2□ The photothermal conversion efficiency ( $\eta$ ) of Cu<sub>2</sub>S/Fe<sub>2</sub>O<sub>3</sub> SPs was calculated as follow equation:

$$\begin{aligned}\eta &= hS (T_{\max, \text{SPs}} - T_{\max, \text{solvent}}) / [I (1 - 10^{-A_{1064}})] \\ &= mc (T_{\max, \text{SPs}} - T_{\max, \text{solvent}}) / [I (1 - 10^{-A_{1064}}) \tau_s] \\ t &= -\tau_s \ln \theta \\ \theta &= (T - T_{\text{surr}}) / (T_{\max, \text{SPs}} - T_{\text{surr}})\end{aligned}$$

where  $h$  is the heat transfer coefficient,  $S$  is the irradiated area,  $m$  is the mass (1.0 g) and  $C$  is the heat capacity (4.2 J g<sup>-1</sup>) of the solvent,  $A_{1064}$  is the absorption of Cu<sub>2</sub>S/Fe<sub>2</sub>O<sub>3</sub> SPs solutions (50 μg mL<sup>-1</sup>),  $\tau_s$  is calculated and shown in Figure S11.  $T_{\max, \text{SPs}}$  and  $T_{\max, \text{solvent}}$  are the highest temperature of the system and the surrounding, respectively. The detailed calculations were shown as follows:

$$\eta_{\text{sp}} = 1 \times 4.2 \times (55 - 30) / [1 \times (1 - 10^{-0.75}) \times 282.417] \times 100\% = 45.2\%$$

## Section 2. Calculation of crystal domain size.

**Table 1 Calculation of crystal domain size**

| pattern                    | $2\theta$ (°) | FWHM (°) |
|----------------------------|---------------|----------|
| CdS, 4.82 nm               | 43.28         | 1.86     |
| Cu <sub>2</sub> S, 6.56 nm | 48.84         | 1.39     |
| ZnS, 3.67 nm               | 43.60         | 2.43     |

The relationship between domain size and FWHM is based on the Debye-Scherrer expression according to which: domain size in nm =  $0.94 \cdot \lambda_x / (\cos\theta \cdot \text{FWHM in radian})$  where  $\lambda_x$  is Cu K $\alpha$  X-ray radiation wavelength of 0.154 nm.

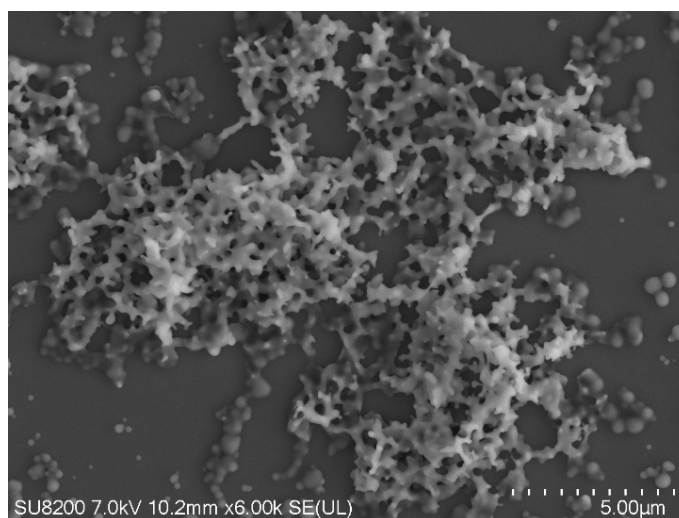

**Figure S1. SEM image of the precursor compounds cysteine-Cd<sup>2+</sup> before NaOH was added.**

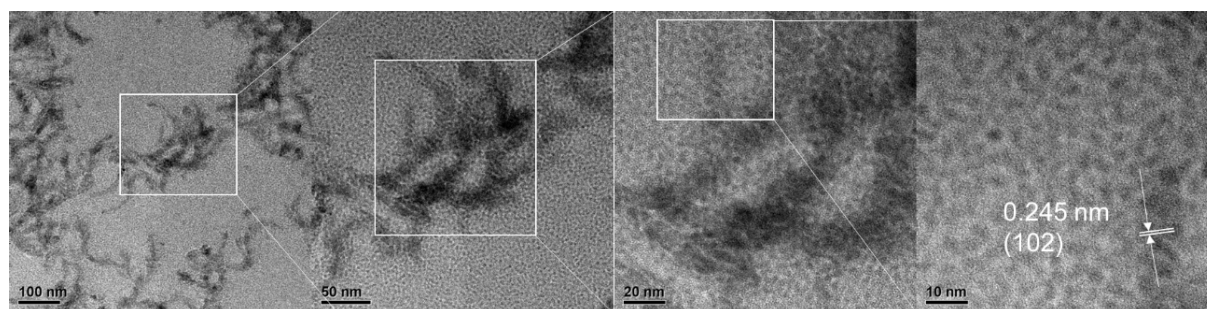

**Figure S2. TEM image of the precursor compounds cysteine-Cd<sup>2+</sup> after NaOH was added.**

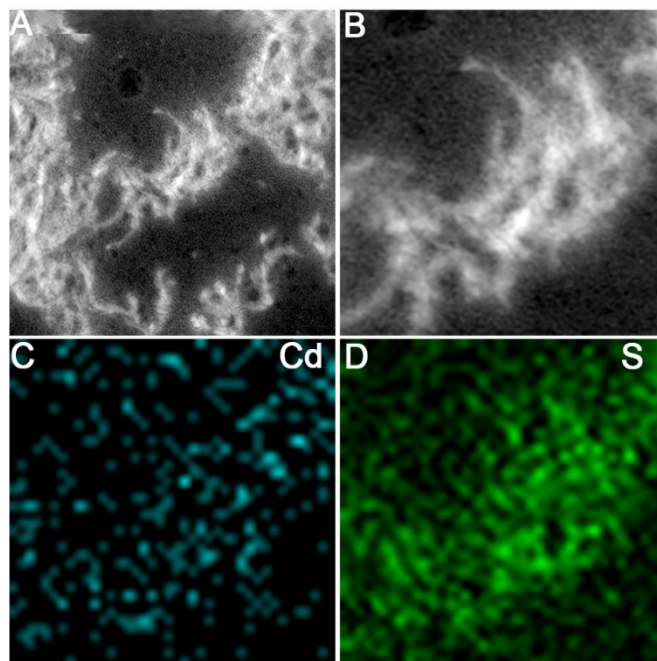

**Figure S3.** The elemental distribution mapping images of the precursors compound cysteine- $\text{Cd}^{2+}$  after NaOH was added.

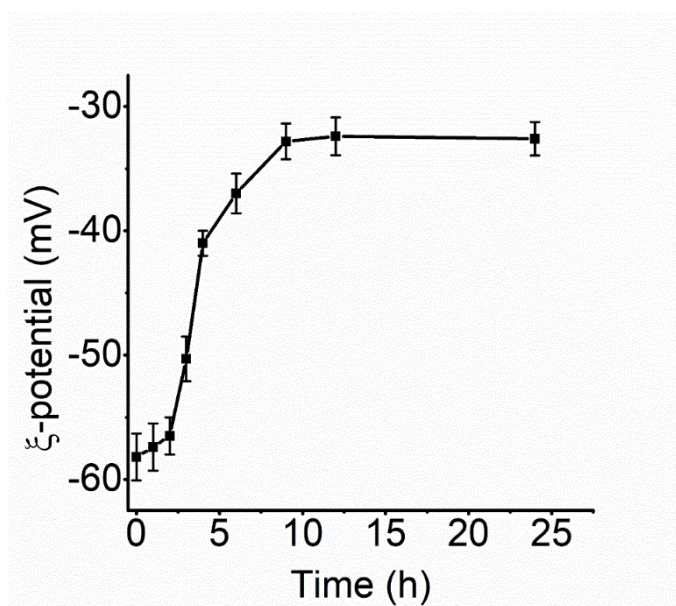

**Figure S4.** The plot of the  $\zeta$ -potential values of the CdS SPs vs. reflux time.

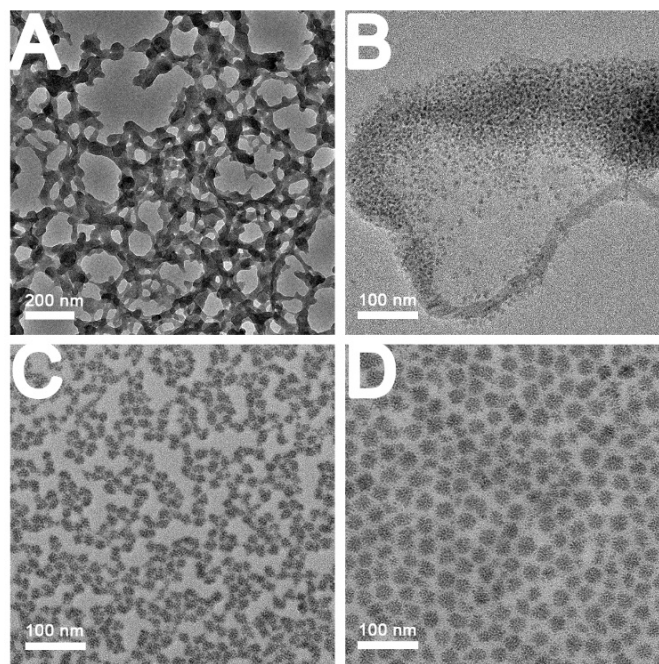

**Figure S5.** The self-assembly process of  $\text{Cu}_2\text{S}$  SPs. (A) The TEM images of the precursor compound cysteine- $\text{Cu}^+$  before NaOH was added (the inset is the photo picture of the corresponding reaction solution). (B) The TEM images of the products fabricated at 1 h. (C) The TEM images of the products fabricated at 5 h. (D) The TEM images of the products fabricated at 12 h.

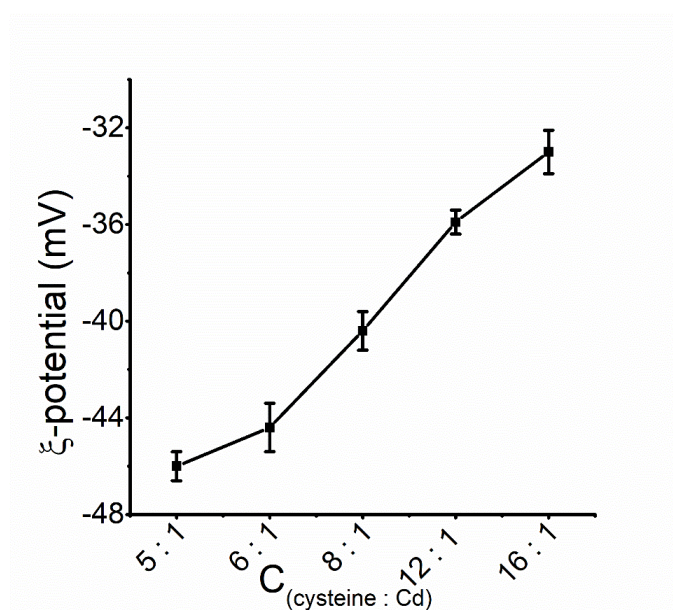

**Figure S6.** The plot of the  $\zeta$ -potential values of the different ratios of cysteine and  $\text{Cd}^+$ .

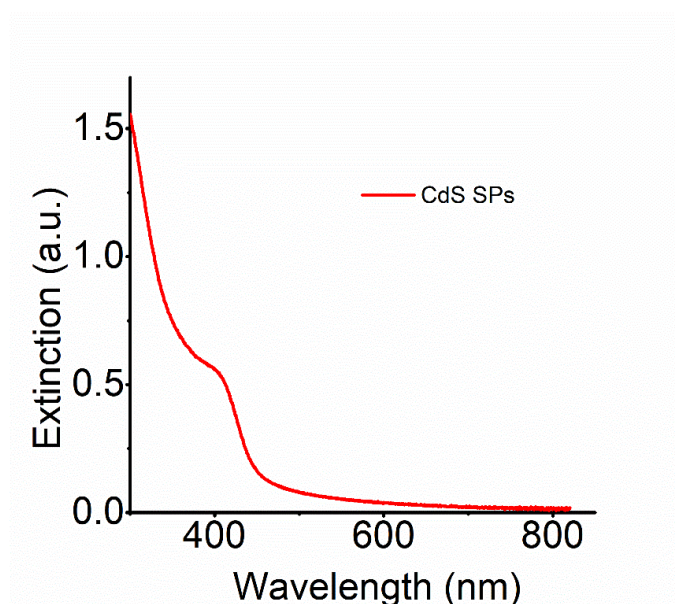

Figure S7. Extinction spectra of CdS SPs.

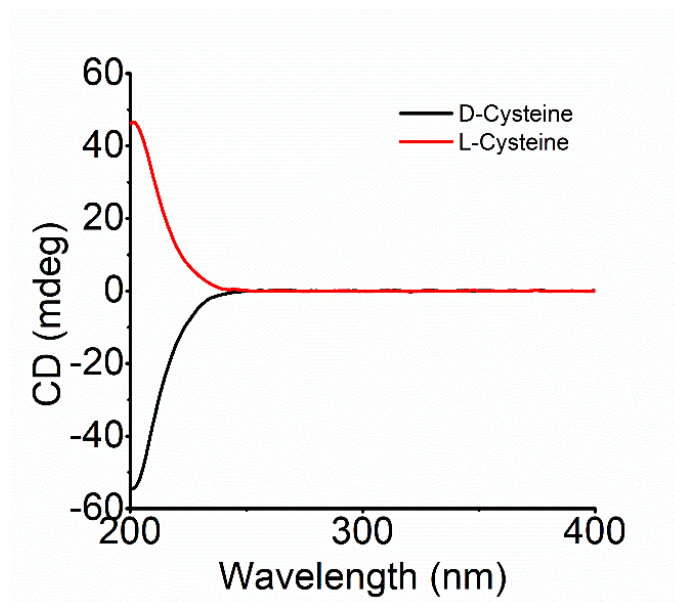

Figure S8. CD spectra of D-cysteine and L-cysteine.

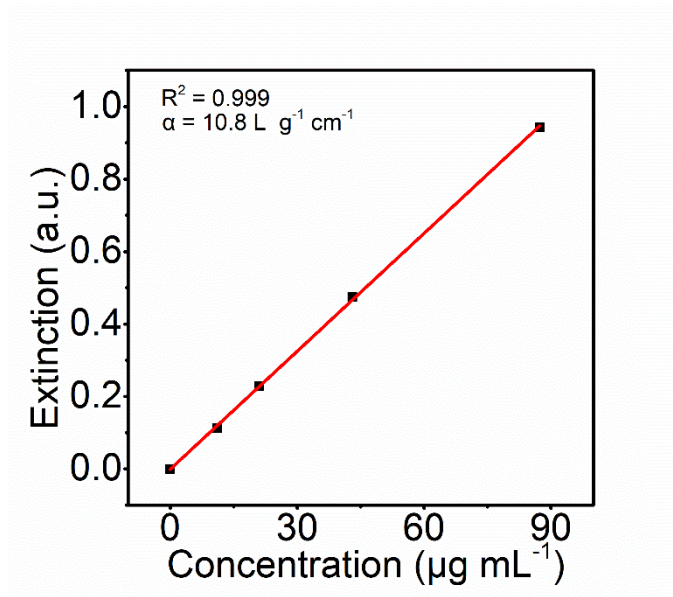

Figure S9. The linear relationship between concentration and extinction intensity of  $\text{Cu}_{2-x}\text{S}$  SPs.

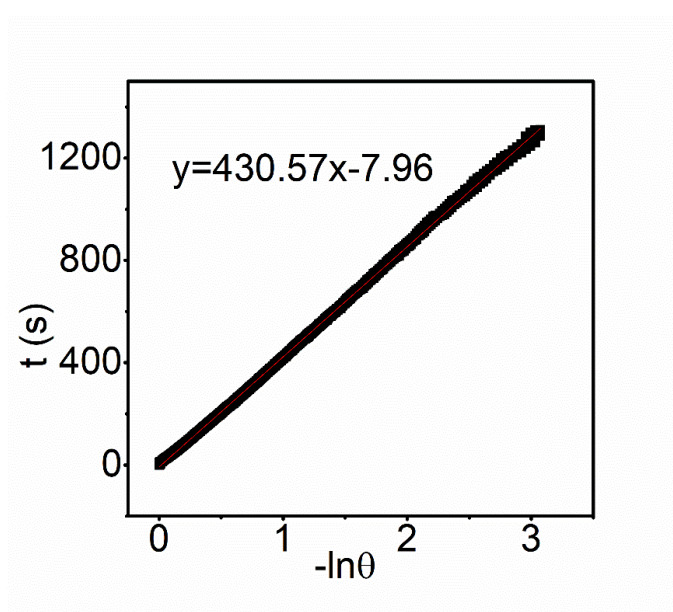

Figure S10. The linear diagrams of dimensionless driving factors and time for  $\text{Cu}_{2-x}\text{S}$  SPs in the cooling process respectively.

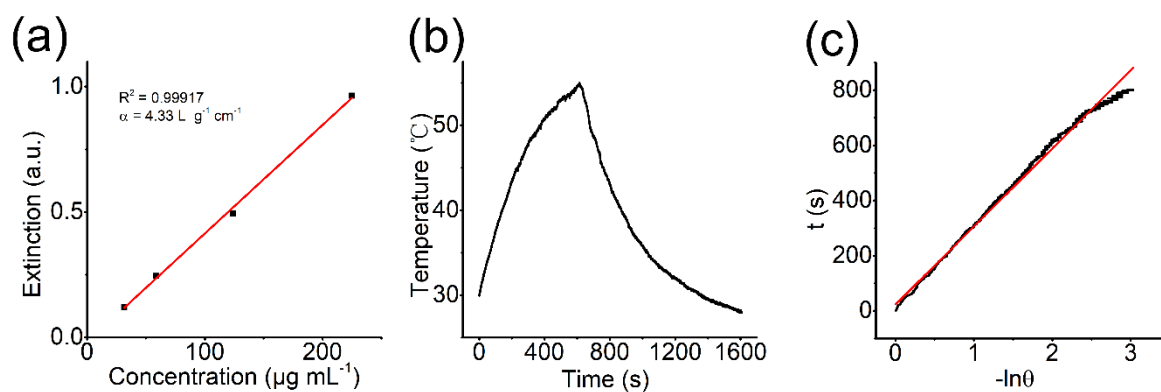

**Figure S11. (A) The linear relationship between material concentration and extinction intensity at 1064 nm of  $\text{Cu}_{2-x}\text{S}/\text{Fe}_2\text{O}_3$  SPs. (B) The temperature changes of  $\text{Cu}_{2-x}\text{S}/\text{Fe}_2\text{O}_3$  SPs before and after laser irradiation at 1064 nm and  $1.0 \text{ W cm}^{-2}$  followed by natural cooling after the laser was turned off. (C) Linear diagrams of dimensionless driving factors and time for materials in the cooling process respectively.**

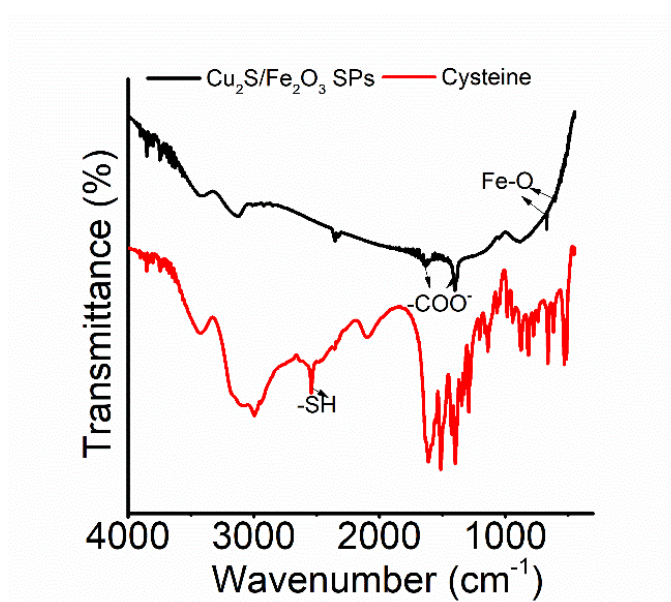

**Figure S12. FT-IR spectra of  $\text{Cu}_2\text{S}/\text{Fe}_2\text{O}_3$  SPs**
